# Supplementary material for: An international consensus on the essential and desirable criteria for an ‘organized’ cancer screening programme
Source: Springer Nature journal article supplement (doi:10.1186/s12916-022-02291-7), 2022-03-23
Supplement: MOESM1 [file 20247404]

### Box S1: Search strategy of the systematic review for organized cancer screening programme

- Databases: PubMed
- Search string
  1. neoplasms[MH] OR cancer\*[tiab] OR neoplas\*[tiab] OR tumor\*[tiab] OR tumour\*[tiab] OR malignan\*[tiab]
  2. mass Screening[MH] OR early detection of cancer[MH]
  3. screening\*[tw] OR early detect\*[tw]
  4. #2 OR #3
  5. #1 AND #4
  6. organized[tiab] OR organised[tiab] OR population-based[tiab] OR population based [tiab]
  7. program[tiab] OR programs[tiab] OR programme[tiab] OR programmes[tiab]
  8. #6 AND #7
  9. #5 AND #8
  10. Limit 9 to (books and documents or comment or editorial or guideline or legislation or letter or practice guideline or review or systematic review or technical report)
- Databases: Web of Science Core Collection
- Search string
  1. TS=(neoplasm) OR TI=(cancer\*) OR AB=(cancer\*) OR TI=(neoplas\*) OR AB=(neoplas\*) OR
  2. TI=(tumor\*) OR AB=(tumor\*) OR TI=(tumour\*) OR AB=(tumour\*) OR TI=(malignan\*) OR AB=(malignan\*)
  3. TS=(screening\*) OR TS=(early detect\*)
  4. #1 AND #2
  5. TI=(organized) OR AB=(organized) OR TI=(organised) OR AB=(organised) OR TI=(population-based) OR AB=(population-based) OR TI=(population based) OR AB=(population based)
  6. TI=(program) OR AB=(program) OR TI=(programs) OR AB=(programs) OR TI=(programme) OR AB=(programme) OR TI=(programmes) OR AB=(programmes)
  7. #4 AND #5
  8. #3 AND #6
  9. Limit 8 to (review or editorial material or letter or book chapter)
- Databases: Embase
- Search string
  1. neoplasm/
  2. "cancer\*" ab.ti.
  3. "neoplas\*" ab.ti.
  4. "tumor\*" ab.ti.
  5. "tumour\*" ab.ti.
  6. "malignan\*" ab.ti.

**Box S1: Search strategy of the systematic review for organized cancer screening programme**

7. #1 or #2 or #3 or #4 or #5 or #6
  8. mass screening/
  9. early cancer diagnosis/
  10. “screening\*” tw.
  11. “early detect\*” tw.
  12. #8 or #9 or #10 or #11
  13. #7 and #12
  14. (organized or organized or population-based or population based).ab.ti.
  15. (Program or programs or programme or programmes).ab.ti.
  16. #14 and #15
  17. #13 and #16
  18. Limit 17 to (books or chapter or editorial or letter or “review”)
- Databases: PubMed Bookshelf
  - Search string
    1. cancer[title]
    2. screening [title]
    3. #1 and #2
- Inclusion and exclusion criteria:
- To be included in the systematic review, eligible studies were: 1) about cancer screening; 2) intended to discuss aspects of cancer screening programme implementation; 3) with three or more characteristics/definition/criteria of organized programmes. We excluded studies if: 1) they were not related to cancer screening; 2) studies only on efficacy, effectiveness, safety, acceptability of cancer screening tools and technology; 3) less than three characteristics/definition/criteria of organized programmes.
